# Supplementary material for: Determination and diagnostic value of CA9 mRNA in peripheral blood of patients with oral leukoplakia
Source: PubMed Central journal article supplement (PMC6009864; doi:10.1080/14756366.2018.1466120), 2018-05-10
Supplement: IENZ_A_1466120_SM3815.pdf [file IENZ_A_1466120_SM3815.pdf]

°Tabla con valores de Ct

| Patient        | Sample Group             | Genee       | Ct        | Ct adjusted        |
|----------------|--------------------------|-------------|-----------|--------------------|
| Control hela   | HELA                     | ABL         | 23,5814   | 23,5814            |
| Control hela   | HELA                     | ABL         | 23,2884   | 23,2884            |
| Control hela   | HELA                     | ABL         | 23,3427   | 23,3427            |
| Control hela   | HELA                     | ABL         | 23,4132   | 23,4132            |
| Control hela   | HELA                     | ABL         | 23,2377   | 23,2377            |
| Control hela   | HELA                     | ABL         | 23,1367   | 23,1367            |
| Control hela   | HELA                     | CA9         | 25,2953   | 25,2953            |
| Control hela   | HELA                     | CA9         | 25,2644   | 25,2644            |
| Control hela   | HELA                     | CA9         | 25,4917   | 25,4917            |
| Control hela   | HELA                     | CA9         | 25,2033   | 25,2033            |
| Control hela   | HELA                     | CA9         | 25,9093   | 25,9093            |
| Control hela   | HELA                     | CA9         | 25,7896   | 25,7896            |
| 1              | Blood leukoplakia sample | ABL         | 27,073    | 27,073             |
| 1              | Blood leukoplakia sample | ABL         | 27,0361   | 27,0361            |
| 1              | Blood leukoplakia sample | CA9         | 36,5402   | 36,5402            |
| 1              | Blood leukoplakia sample | CA9         | 36,1042   | 36,1042            |
| 2              | Blood leukoplakia sample | ABL         | 26,9159   | 26,9159            |
| 2              | Blood leukoplakia sample | ABL         | 26,8047   | 26,8047            |
| 2              | Blood leukoplakia sample | CA9         | 34,6513   | 34,6513            |
| 2              | Blood leukoplakia sample | CA9         | 34,3632   | 34,3632            |
| 3              | Blood leukoplakia sample | ABL         | 26,4249   | 26,4249            |
| 3              | Blood leukoplakia sample | ABL         | 26,305    | 26,305             |
| 3              | Blood leukoplakia sample | CA9         | 34,8295   | 34,8295            |
| <b>Patient</b> | <b>Sample Group</b>      | <b>Gene</b> | <b>Ct</b> | <b>Ct adjusted</b> |

|                |                          |             |           |                    |
|----------------|--------------------------|-------------|-----------|--------------------|
| 3              | Blood leukoplakia sample | CA9         | 36,7868   | 36,7868            |
| 4              | Blood leukoplakia sample | ABL         | 26,5187   | 26,5187            |
| 4              | Blood leukoplakia sample | ABL         | 26,5313   | 26,5313            |
| 4              | Blood leukoplakia sample | CA9         | 35,1701   | 35,1701            |
| 4              | Blood leukoplakia sample | CA9         | 34,2211   | 34,2211            |
| 5              | Blood leukoplakia sample | ABL         | 27,3896   | 27,3896            |
| 5              | Blood leukoplakia sample | ABL         | 27,5234   | 27,5234            |
| 5              | Blood leukoplakia sample | CA9         | 35,723    | 35,723             |
| 6              | Blood leukoplakia sample | ABL         | 28,4569   | 28,4569            |
| 6              | Blood leukoplakia sample | ABL         | 28,4203   | 28,4203            |
| 6              | Blood leukoplakia sample | CA9         | 37,2957   | 37,2957            |
| 6              | Blood leukoplakia sample | CA9         | 38,0139   | 38,0139            |
| 7              | Blood leukoplakia sample | ABL         | 27,1688   | 27,1688            |
| 7              | Blood leukoplakia sample | ABL         | 27,1755   | 27,1755            |
| 7              | Blood leukoplakia sample | CA9         | 35,7265   | 35,7265            |
| 7              | Blood leukoplakia sample | CA9         | 34,7815   | 34,7815            |
| 8              | Blood leukoplakia sample | ABL         | 26,7204   | 26,7204            |
| 8              | Blood leukoplakia sample | ABL         | 26,8416   | 26,8416            |
| <b>Patient</b> | <b>Sample Group</b>      | <b>Gene</b> | <b>Ct</b> | <b>Ct adjusted</b> |

|                |                          |             |           |                    |
|----------------|--------------------------|-------------|-----------|--------------------|
| 8              | Blood leukoplakia sample | CA9         | 35,5768   | 35,5768            |
| 8              | Blood leukoplakia sample | CA9         | 34,5944   | 34,5944            |
| 8              | Blood leukoplakia sample | CA9         | 34,993    | 34,993             |
| 8              | Blood leukoplakia sample | CA9         | 36,3709   | 36,3709            |
| 9              | Blood leukoplakia sample | ABL         | 26,9734   | 26,9734            |
| 9              | Blood leukoplakia sample | ABL         | 26,8902   | 26,8902            |
| 9              | Blood leukoplakia sample | CA9         | 35,1623   | 35,1623            |
| 10             | Blood leukoplakia sample | ABL         | 30,9742   | 30,9742            |
| 10             | Blood leukoplakia sample | ABL         | 30,9153   | 30,9153            |
| 10             | Blood leukoplakia sample | CA9         | 36,8946   | 36,8946            |
| 11             | Blood leukoplakia sample | ABL         | 28,6297   | 28,6297            |
| 11             | Blood leukoplakia sample | CA9         | 36,5868   | 36,5868            |
| 11             | Blood leukoplakia sample | CA9         | 36,3849   | 36,3849            |
| 12             | Blood leukoplakia sample | ABL         | 25,9463   | 25,9463            |
| 12             | Blood leukoplakia sample | ABL         | 25,8385   | 25,8385            |
| 12             | Blood leukoplakia sample | CA9         | 37,0579   | 37,0579            |
| 12             | Blood leukoplakia sample | CA9         | 36,3197   | 36,3197            |
| 12             | Blood leukoplakia sample | CA9         | 37,7687   | 37,7687            |
| <b>Patient</b> | <b>Sample Group</b>      | <b>Gene</b> | <b>Ct</b> | <b>Ct adjusted</b> |

|                |                          |             |              |                    |
|----------------|--------------------------|-------------|--------------|--------------------|
| 12             | Blood leukoplakia sample | CA9         | 36,2126      | 36,2126            |
| 13             | Blood leukoplakia sample | ABL         | 26,9089      | 26,9089            |
| 13             | Blood leukoplakia sample | ABL         | 25,1044      | 25,1044            |
| 13             | Blood leukoplakia sample | CA9         | 34,1031      | 34,1031            |
| 13             | Blood leukoplakia sample | CA9         | 34,7411      | 34,7411            |
| 14             | Blood leukoplakia sample | ABL         | 28,045       | 28,045             |
| 14             | Blood leukoplakia sample | ABL         | 26,0586      | 26,0586            |
| 14             | Blood leukoplakia sample | CA9         | 36,6717      | 36,6717            |
| 14             | Blood leukoplakia sample | CA9         | 35,3739      | 35,3739            |
| 15             | Blood leukoplakia sample | ABL         | 28,8879      | 28,8879            |
| 15             | Blood leukoplakia sample | ABL         | 28,7928      | 28,7928            |
| 15             | Blood leukoplakia sample | CA9         | 37,1521      | 37,1521            |
| 15             | Blood leukoplakia sample | CA9         | undetermined | 40                 |
| 16             | Blood leukoplakia sample | ABL         | 31,3117      | 31,3117            |
| 16             | Blood leukoplakia sample | ABL         | 31,3387      | 31,3387            |
| 16             | Blood leukoplakia sample | CA9         | undetermined | 40                 |
| 16             | Blood leukoplakia sample | CA9         | undetermined | 40                 |
| 17             | Blood leukoplakia sample | ABL         | 32,0522      | 32,0522            |
| <b>Patient</b> | <b>Sample Group</b>      | <b>Gene</b> | <b>Ct</b>    | <b>Ct adjusted</b> |

|                |                          |             |              |                    |
|----------------|--------------------------|-------------|--------------|--------------------|
| 17             | Blood leukoplakia sample | ABL         | 321.238      | 32,1238            |
| 17             | Blood leukoplakia sample | CA9         | 37.785       | 37,785             |
| 18             | Blood leukoplakia sample | ABL         | 253.056      | 25,3056            |
| 18             | Blood leukoplakia sample | ABL         | 252.641      | 25,2641            |
| 18             | Blood leukoplakia sample | CA9         | 345.337      | 34,5337            |
| 18             | Blood leukoplakia sample | CA9         | 349.138      | 34,9138            |
| 18             | Blood leukoplakia sample | ABL         | 264.178      | 26,4178            |
| 18             | Blood leukoplakia sample | ABL         | 264.722      | 26,4722            |
| 18             | Blood leukoplakia sample | CA9         | 348.481      | 34,8481            |
| 18             | Blood leukoplakia sample | CA9         | 352.197      | 35,2197            |
| 19             | Blood leukoplakia sample | ABL         | 273.356      | 27,3356            |
| 19             | Blood leukoplakia sample | ABL         | 273.905      | 27,3905            |
| 19             | Blood leukoplakia sample | CA9         | undetermined | 40                 |
| 19             | Blood leukoplakia sample | CA9         | 35,8366      | 35,8366            |
| 20             | Blood leukoplakia sample | ABL         | 28,3         | 28,3               |
| 20             | Blood leukoplakia sample | ABL         | 28,328       | 28,328             |
| 20             | Blood leukoplakia sample | CA9         | undetermined | 40                 |
| 20             | Blood leukoplakia sample | CA9         | 36,399       | 36,399             |
| <b>Patient</b> | <b>Sample Group</b>      | <b>Gene</b> | <b>Ct</b>    | <b>Ct adjusted</b> |

|                |                          |             |              |                    |
|----------------|--------------------------|-------------|--------------|--------------------|
| 21             | Blood leukoplakia sample | ABL         | 25,854       | 25,854             |
| 21             | Blood leukoplakia sample | ABL         | 25,7852      | 25,7852            |
| 21             | Blood leukoplakia sample | CA9         | 37,4851      | 37,4851            |
| 21             | Blood leukoplakia sample | CA9         | 35,3558      | 35,3558            |
| 22             | Blood healthy patient    | ABL         | 31,0935      | 31,0935            |
| 22             | Blood healthy patient    | ABL         | 31,2869      | 31,2869            |
| 22             | Blood healthy patient    | CA9         | 37,0302      | 37,0302            |
| 22             | Blood healthy patient    | CA9         | 37,7119      | 37,7119            |
| 23             | Blood healthy patient    | ABL         | 31,8735      | 31,8735            |
| 23             | Blood healthy patient    | ABL         | 31,9638      | 31,9638            |
| 23             | Blood healthy patient    | CA9         | 38,2822      | 38,2822            |
| 23             | Blood healthy patient    | CA9         | undetermined | 40                 |
| 24             | Blood healthy patient    | ABL         | 30,5648      | 30,5648            |
| 24             | Blood healthy patient    | ABL         | 30,2583      | 30,2583            |
| 24             | Blood healthy patient    | CA9         | undetermined | 40                 |
| 24             | Blood healthy patient    | CA9         | 37,4665      | 37,4665            |
| 25             | Blood healthy patient    | ABL         | 32,2128      | 32,2128            |
| 25             | Blood healthy patient    | ABL         | 32,0952      | 32,0952            |
| 25             | Blood healthy patient    | CA9         | 37,9358      | 37,9358            |
| 25             | Blood healthy patient    | CA9         | 36,9853      | 36,9853            |
| 26             | Blood healthy patient    | ABL         | 28,0264      | 28,0264            |
| 26             | Blood healthy patient    | ABL         | 28,1654      | 28,1654            |
| 26             | Blood healthy patient    | CA9         | 36,2473      | 36,2473            |
| 26             | Blood healthy patient    | CA9         | 36,4254      | 36,4254            |
| <b>Patient</b> | <b>Sample Group</b>      | <b>Gene</b> | <b>Ct</b>    | <b>Ct adjusted</b> |
| 27             | Blood healthy patient    | ABL         | 26,9817      | 26,9817            |

|                |                       |             |              |                    |
|----------------|-----------------------|-------------|--------------|--------------------|
| 27             | Blood healthy patient | ABL         | 26,7214      | 26,7214            |
| 27             | Blood healthy patient | CA9         | 34,737       | 34,737             |
| 27             | Blood healthy patient | CA9         | 34,9976      | 34,9976            |
| 28             | Blood healthy patient | ABL         | 33,3446      | 33,3446            |
| 28             | Blood healthy patient | ABL         | 33,0539      | 33,0539            |
| 28             | Blood healthy patient | CA9         | undetermined | 40                 |
| 28             | Blood healthy patient | CA9         | undetermined | 40                 |
| 29             | Blood healthy patient | ABL         | 32,14        | 32,14              |
| 29             | Blood healthy patient | ABL         | 32,1451      | 32,1451            |
| 29             | Blood healthy patient | CA9         | undetermined | 40                 |
| 29             | Blood healthy patient | CA9         | 38,1734      | 38,1734            |
| 30             | Blood healthy patient | ABL         | 25,5421      | 25,5421            |
| 30             | Blood healthy patient | ABL         | 25,4532      | 25,4532            |
| 30             | Blood healthy patient | CA9         | 34,6065      | 34,6065            |
| 30             | Blood healthy patient | CA9         | 35,4536      | 35,4536            |
| 31             | Blood healthy patient | ABL         | 25,4662      | 25,4662            |
| 31             | Blood healthy patient | ABL         | 25,5529      | 25,5529            |
| 31             | Blood healthy patient | CA9         | 34,6645      | 34,6645            |
| 31             | Blood healthy patient | CA9         | 36,1388      | 36,1388            |
| 32             | Blood healthy patient | ABL         | 27,3468      | 27,3468            |
| 32             | Blood healthy patient | ABL         | 27,379       | 27,379             |
| 32             | Blood healthy patient | CA9         | 35,6702      | 35,6702            |
| 33             | Blood healthy patient | ABL         | 30,3866      | 30,3866            |
| 33             | Blood healthy patient | ABL         | 30,476       | 30,476             |
| 33             | Blood healthy patient | CA9         | 37,9632      | 37,9632            |
| <b>Patient</b> | <b>Sample Group</b>   | <b>Gene</b> | <b>Ct</b>    | <b>Ct adjusted</b> |
| 34             | Blood healthy patient | ABL         | 31,1863      | 31,1863            |
| 34             | Blood healthy patient | CA9         | 36,9566      | 36,9566            |

|                |                       |             |              |                    |
|----------------|-----------------------|-------------|--------------|--------------------|
| 34             | Blood healthy patient | CA9         | 38,5731      | 38,5731            |
| 35             | Blood healthy patient | ABL         | 31,0089      | 31,0089            |
| 35             | Blood healthy patient | ABL         | 31,048       | 31,048             |
| 35             | Blood healthy patient | CA9         | undetermined | 40                 |
| 35             | Blood healthy patient | CA9         | undetermined | 40                 |
| 36             | Blood healthy patient | ABL         | 26,0034      | 26,0034            |
| 36             | Blood healthy patient | ABL         | 26,0221      | 26,0221            |
| 36             | Blood healthy patient | CA9         | 35,7907      | 35,7907            |
| 36             | Blood healthy patient | CA9         | 36,5358      | 36,5358            |
| 37             | Blood healthy patient | ABL         | 27,6305      | 27,6305            |
| 37             | Blood healthy patient | ABL         | 26,4948      | 26,4948            |
| 37             | Blood healthy patient | CA9         | 37,6575      | 37,6575            |
| 37             | Blood healthy patient | CA9         | 34,992       | 34,992             |
| 38             | Blood healthy patient | ABL         | 26,914       | 26,914             |
| 38             | Blood healthy patient | ABL         | 26,863       | 26,863             |
| 38             | Blood healthy patient | CA9         | 35,445       | 35,445             |
| 38             | Blood healthy patient | CA9         | 34,803       | 34,803             |
| 39             | Blood healthy patient | ABL         | 27,0263      | 27,0263            |
| 39             | Blood healthy patient | ABL         | 27,1306      | 27,1306            |
| 39             | Blood healthy patient | CA9         | 35,5105      | 35,5105            |
| 39             | Blood healthy patient | CA9         | 33,9456      | 33,9456            |
| 40             | Blood healthy patient | ABL         | 28,5257      | 28,5257            |
| 40             | Blood healthy patient | ABL         | 28,2063      | 28,2063            |
| 40             | Blood healthy patient | CA9         | undetermined | 40                 |
| <b>Patient</b> | <b>Sample Group</b>   | <b>Gene</b> | <b>Ct</b>    | <b>Ct adjusted</b> |
| 40             | Blood healthy patient | CA9         | 36,3744      | 36,3744            |
| 41             | Blood healthy patient | ABL         | 26,0122      | 26,0122            |
| 41             | Blood healthy patient | ABL         | 26,1119      | 26,1119            |



|                |                       |             |              |                    |
|----------------|-----------------------|-------------|--------------|--------------------|
| 41             | Blood healthy patient | CA9         | 36,1497      | 36,1497            |
| 41             | Blood healthy patient | CA9         | 37,6402      | 37,6402            |
| 42             | Blood healthy patient | ABL         | 27,8563      | 27,8563            |
| 42             | Blood healthy patient | ABL         | 27,748       | 27,748             |
| 42             | Blood healthy patient | CA9         | 36,3522      | 36,3522            |
| 42             | Blood healthy patient | CA9         | 35,588       | 35,588             |
| 43             | Blood healthy patient | ABL         | 27,3914      | 27,3914            |
| 43             | Blood healthy patient | ABL         | 27,2777      | 27,2777            |
| 43             | Blood healthy patient | CA9         | 35,7572      | 35,7572            |
| 43             | Blood healthy patient | CA9         | 39,0368      | 39,0368            |
| 43             | Blood healthy patient | ABL         | 25,9869      | 25,9869            |
| 44             | Blood healthy patient | ABL         | 25,9725      | 25,9725            |
| 44             | Blood healthy patient | CA9         | undetermined | 40                 |
| 44             | Blood healthy patient | CA9         | 35,7205      | 35,7205            |
| 45             | Healthy tissue        | ABL         | 28,0829      | 28,0829            |
| 45             | Healthy tissue        | ABL         | 28,1278      | 28,1278            |
| 45             | Healthy tissue        | CA9         | 34,8158      | 34,8158            |
| 45             | Healthy tissue        | CA9         | 35,0194      | 35,0194            |
| 46             | Healthy tissue        | ABL         | 26,8332      | 26,8332            |
| 46             | Healthy tissue        | ABL         | 26,8407      | 26,8407            |
| 46             | Healthy tissue        | CA9         | 32,5763      | 32,5763            |
| 46             | Healthy tissue        | CA9         | 32,9295      | 32,9295            |
| 47             | Healthy tissue        | ABL         | 27,9814      | 27,9814            |
| 47             | Healthy tissue        | ABL         | 27,9867      | 27,9867            |
| 47             | Healthy tissue        | CA9         | 33,0001      | 33,0001            |
| 47             | Healthy tissue        | CA9         | 32,9585      | 32,9585            |
| 48             | Leukoplakia tissue    | ABL         | 31,8639      | 31,8639            |
| <b>Patient</b> | <b>Sample Group</b>   | <b>Gene</b> | <b>Ct</b>    | <b>Ct adjusted</b> |
| 48             | Leukoplakia tissue    | ABL         | 31,8152      | 31,8152            |
| 48             | Leukoplakia tissue    | CA9         | 32,5078      | 32,5078            |
| 48             | Leukoplakia tissue    | CA9         | 32,913       | 32,913             |

|    |                    |     |         |         |
|----|--------------------|-----|---------|---------|
| 49 | Leukoplakia tissue | ABL | 27,4748 | 27,4748 |
| 49 | Leukoplakia tissue | ABL | 27,4907 | 27,4907 |
| 49 | Leukoplakia tissue | CA9 | 31,3805 | 31,3805 |
| 49 | Leukoplakia tissue | CA9 | 31,1685 | 31,1685 |
| 50 | Leukoplakia tissue | ABL | 26,2855 | 26,2855 |
| 50 | Leukoplakia tissue | ABL | 26,4528 | 26,4528 |
| 50 | Leukoplakia tissue | CA9 | 29,7789 | 29,7789 |
| 50 | Leukoplakia tissue | CA9 | 29,681  | 29,681  |
| 51 | Tumoral tissue     | ABL | 29,0815 | 29,0815 |
| 51 | Tumoral tissue     | ABL | 29,2647 | 29,2647 |
| 51 | Tumoral tissue     | ABL | 27,3958 | 27,3958 |
| 51 | Tumoral tissue     | ABL | 27,4342 | 27,4342 |
| 51 | Tumoral tissue     | CA9 | 23,8009 | 23,8009 |
| 51 | Tumoral tissue     | CA9 | 23,6395 | 23,6395 |
| 51 | Tumoral tissue     | CA9 | 23,792  | 23,792  |
| 51 | Tumoral tissue     | CA9 | 23,7307 | 23,7307 |
| 52 | Tumoral tissue     | ABL | 27,3867 | 27,3867 |
| 52 | Tumoral tissue     | ABL | 27,6689 | 27,6689 |
| 52 | Tumoral tissue     | CA9 | 30,9779 | 30,9779 |
| 52 | Tumoral tissue     | CA9 | 31,2993 | 31,2993 |
| 53 | Tumoral tissue     | ABL | 26,1574 | 26,1574 |
| 53 | Tumoral tissue     | ABL | 25,9676 | 25,9676 |
| 53 | Tumoral tissue     | CA9 | 31,5139 | 31,5139 |
| 53 | Tumoral tissue     | CA9 | 31,4922 | 31,4922 |
| 54 | Tumoral tissue     | ABL | 26,571  | 26,571  |
| 54 | Tumoral tissue     | ABL | 26,4728 | 26,4728 |
| 54 | Tumoral tissue     | CA9 | 27,3532 | 27,3532 |
| 54 | Tumoral tissue     | CA9 | 27,4235 | 27,4235 |
